# Supplementary material for: Seek, and ye shall find: Accessing the global epidemiological literature in different languages
Source: Springer Nature journal article supplement (doi:10.1186/1742-7622-5-21), 2008-09-30
Supplement: Additional file 4 [file 1742-7622-5-21-s4.pdf]

Spanish / Español

Editorial

***El que busca encuentra: Accesar la literatura global en epidemiología en distintos idiomas***

Autor: Isaac Chun-Hai Fung

Resumen

La serie temática de *Temas Emergentes en Epidemiología: “Más allá del inglés: accesar la literatura global en epidemiología”*, resalta la riqueza de la literatura en epidemiología y salud pública en los principales idiomas del mundo así como las bases de datos bibliográficas a través de las cuales se pueden buscar y accesar. Esta editorial sugiere que todas las revisiones sistemáticas de la literatura en epidemiología y salud pública deberían de incluir la literatura publicada en los principales idiomas del mundo y que el uso de bases de datos bibliográficas regionales y en otros idiomas que el inglés debería de convertirse en rutina.

*Traducido al español por Annick Bórquez*
